# Supplementary material
Source: HighWire-hosted journal article supplement (https://erj.ersjournals.com/highwire/filestream/131029/field_highwire_adjunct_files/3/ERJ-02049-2015_Appendix_4.pdf)
Supplement: ERJ-02049-2015_Appendix_4.pdf [file ERJ-02049-2015_Appendix_4.pdf]

**Appendix 4. Voting percentages of modified Delphi method by working group members on outcome domains and case-mix factors.**

| Conclusion after 1st vote | Domain                                            | Percentage vote for inclusion | Comments                                                                                                                                                                                                                                                                                                                                     |
|---------------------------|---------------------------------------------------|-------------------------------|----------------------------------------------------------------------------------------------------------------------------------------------------------------------------------------------------------------------------------------------------------------------------------------------------------------------------------------------|
| <b>OUTCOME DOMAINS</b>    |                                                   |                               |                                                                                                                                                                                                                                                                                                                                              |
| <b>Include</b>            | Overall survival                                  | 100%                          |                                                                                                                                                                                                                                                                                                                                              |
|                           | Treatment-related mortality                       | 100%                          |                                                                                                                                                                                                                                                                                                                                              |
|                           | Major surgical complications                      | 100%                          |                                                                                                                                                                                                                                                                                                                                              |
|                           | Major systemic therapy complications              | 100%                          |                                                                                                                                                                                                                                                                                                                                              |
|                           | Global health status / Quality of life            | 100%                          |                                                                                                                                                                                                                                                                                                                                              |
|                           | Cause of death                                    | 93%                           |                                                                                                                                                                                                                                                                                                                                              |
|                           | Major radiation complications                     | 93%                           |                                                                                                                                                                                                                                                                                                                                              |
|                           | ECOG/WHO performance status                       | 93%                           |                                                                                                                                                                                                                                                                                                                                              |
|                           | Time from diagnosis to treatment                  | 86%                           |                                                                                                                                                                                                                                                                                                                                              |
|                           | Shortness of breath                               | 80%                           |                                                                                                                                                                                                                                                                                                                                              |
|                           | Duration of time spent in hospital at end of life | 80%                           |                                                                                                                                                                                                                                                                                                                                              |
|                           | Pain                                              | 73%                           |                                                                                                                                                                                                                                                                                                                                              |
|                           | Fatigue                                           | 73%                           |                                                                                                                                                                                                                                                                                                                                              |
|                           | Emotional functioning                             | 67%                           |                                                                                                                                                                                                                                                                                                                                              |
| Cough                     | 67%                                               |                               |                                                                                                                                                                                                                                                                                                                                              |
| <b>Debate Further</b>     | Progression-free survival                         | 87%                           | Debated and agreed to exclude, since measurement correlates to frequency of follow-up imaging which is not standardized (ascertainment bias).                                                                                                                                                                                                |
|                           | Weight loss                                       | 60%                           | Debated and agreed to exclude since weight loss as an outcome is not measured in most common cancer and lung cancer PROMs, suggesting it is not the highest concern for lung cancer patients. This is likely because proximal causes of weight loss are more important to patients (e.g. loss of appetite, depression, disease progression). |
|                           | Physical function                                 | 60%                           | Debated and agreed to include since physical functioning (including ADLs, walking) is an important component of patient quality of life, as evidenced by its inclusion in many of the most common cancer and lung cancer PROMs.                                                                                                              |

|                                                          |     |                                                                                                                                                                                                                                                                                |
|----------------------------------------------------------|-----|--------------------------------------------------------------------------------------------------------------------------------------------------------------------------------------------------------------------------------------------------------------------------------|
| Dying in accordance with patient wishes / place of death | 50% | Debated and the group felt strongly to include a measure about the quality of dying and death. Acknowledging the difficulties of this particular outcome, the group opted to include 'Place of death'.                                                                         |
| Cognitive functioning                                    | 47% | Debated and agreed to include since cognitive functioning is an important component of patient quality of life that can be affected in lung cancer by treatment and/or brain metastases as evidenced by its inclusion in many of the most common cancer and lung cancer PROMs. |
| Social functioning                                       | 47% | Debated and agreed to include since social functioning (including interference with family life) is an important component of patient quality of life, as evidenced by its inclusion in many of the most common cancer and lung cancer PROMs.                                  |
| Hemoptysis                                               | 47% | Debated and agreed to exclude hemoptysis since although it is a frightening and potentially deadly symptom, though not frequently included in most common cancer and lung cancer PROMs.                                                                                        |

---

|                |                                                |     |
|----------------|------------------------------------------------|-----|
| <b>Exclude</b> | Major complications due to other interventions | 40% |
|                | Role function / functional well-being          | 40% |
|                | Nausea and vomiting                            | 40% |
|                | Pulmonary function                             | 40% |
|                | Pain medication use                            | 36% |
|                | Diarrhea                                       | 27% |
|                | Loss of appetite                               | 21% |
|                | Metastasis-free survival                       | 20% |
|                | Insomnia                                       | 13% |
|                | Constipation                                   | 13% |

---

**CASE-MIX VARIABLES**

---

|                |                    |      |
|----------------|--------------------|------|
| <b>Include</b> | Date of birth      | 100% |
|                | Sex                | 100% |
|                | Performance status | 100% |
|                | Clinical stage     | 100% |
|                | Pathological stage | 100% |
|                | Histology          | 100% |

---

|                       |                                      |     |                                                                                                                                                                                                                               |
|-----------------------|--------------------------------------|-----|-------------------------------------------------------------------------------------------------------------------------------------------------------------------------------------------------------------------------------|
|                       | <i>EGFR</i> mutation status          | 94% |                                                                                                                                                                                                                               |
|                       | ALK translocation status             | 94% |                                                                                                                                                                                                                               |
|                       | Pulmonary function; FEV-1            | 94% |                                                                                                                                                                                                                               |
|                       | Smoking status                       | 89% |                                                                                                                                                                                                                               |
|                       | Treatment intent                     | 89% |                                                                                                                                                                                                                               |
|                       | Basis of diagnosis                   | 89% |                                                                                                                                                                                                                               |
|                       | Comorbidities                        | 88% |                                                                                                                                                                                                                               |
|                       | Ethnicity                            | 83% |                                                                                                                                                                                                                               |
|                       | Patient-reported health status       | 72% |                                                                                                                                                                                                                               |
|                       | Completed treatment                  | 72% |                                                                                                                                                                                                                               |
| <b>Debate Further</b> | <i>KRAS</i> mutation status          | 67% | Debated and agreed to exclude since there are no biologic therapies targeting the <i>KRAS</i> mutation. Agreed that the steering committee will review annually if <i>KRAS</i> or other mutations should be added to the set. |
|                       | Weight loss                          | 65% | Debated and agreed to include as a well-established prognostic factor for survival.                                                                                                                                           |
|                       | Pulmonary function; DLCO             | 65% | Debated and agreed to exclude, as FEV-1 was an adequate measure of pulmonary function.                                                                                                                                        |
|                       | Synchronous lung tumor               | 56% | Debated and agreed to exclude, since this is captured by the clinical and pathological staging system.                                                                                                                        |
|                       | Educational level                    | 53% | Debated and agreed to include as a marker for socio-economic status that is reliably measured, given that socio-economic status is a major determinant of patient outcomes.                                                   |
|                       | Marital status                       | 44% | Debated and agreed to exclude as a lower priority case-mix measure, acknowledging it may be of some value in representing social support.                                                                                     |
| <b>Exclude</b>        | Primary tumor laterality             | 39% |                                                                                                                                                                                                                               |
|                       | Bronchoscopy                         | 39% |                                                                                                                                                                                                                               |
|                       | Proximity to proximal bronchial tree | 35% |                                                                                                                                                                                                                               |
|                       | Living status                        | 29% |                                                                                                                                                                                                                               |
|                       | Source of referral                   | 28% |                                                                                                                                                                                                                               |
|                       | Family history of lung cancer        | 22% |                                                                                                                                                                                                                               |

---

Consensus on each outcome and case-mix domain was reached through a pre-defined, systematic modified-Delphi method. Domains were proposed by the Project Team to the Working Group on the first call followed by group discussion on each item. After the call, Working Group members voted anonymously on the proposed domains in the Standard Set. Items receiving greater than or equal to 66% approval were included, while items receiving less than 40% approval were excluded. Domains falling in between these cutoffs were subject to further discussion in subsequent teleconferences and re-voted upon until consensus for inclusion or exclusion was reached.

Approval ratings included above correspond to first round voting results in response to the question: "Do you feel this outcome domain or case-mix variable should be included in the Standard Set for patients with lung cancer."

---

ECOG: Eastern Cooperative Oncology Group; WHO: World Health Organization; *EGFR*: Epidermal Growth Factor Receptor; ALK: Anaplastic Lymphoma Kinase; FEV-1: Forced Expiratory Volume-1; *KRAS*: Kirsten Ras; DLCO: Diffusing Capacity of the Lung
